# Supplementary material for: The Mechanism Underlying the Hypoglycemic Effect of Epimedin C on Mice with Type 2 Diabetes Mellitus Based on Proteomic Analysis
Source: MDPI journal article supplement (doi:10.3390/nu16010025), 2023-12-21
Supplement: s1 [file s1]

## SUPPLEMENTARY MATERIALS

### TABLES

**Table S1.** Experimental groups and treatments ( $n = 10$  in each group).

| Group                                          | Treatment                         | Intraperitoneal injection | Diet          |
|------------------------------------------------|-----------------------------------|---------------------------|---------------|
| NC (normal control) group                      | sterile distilled water           | saline                    | control diet  |
| MC (model control) group                       | sterile distilled water           | streptozotocin            | high-fat diet |
| PC1 (the first positive control) group         | 200 mg·kg <sup>-1</sup> metformin | streptozotocin            | high-fat diet |
| PC2 (the second positive control) group        | 5 mg·kg <sup>-1</sup> glimepiride | streptozotocin            | high-fat diet |
| EC30 (30 mg·kg <sup>-1</sup> epimedin C) group | 30 mg·kg <sup>-1</sup> epimedin C | streptozotocin            | high-fat diet |
| EC10 (10 mg·kg <sup>-1</sup> epimedin C) group | 10 mg·kg <sup>-1</sup> epimedin C | streptozotocin            | high-fat diet |
| EC5 (5 mg·kg <sup>-1</sup> epimedin C) group   | 5 mg·kg <sup>-1</sup> epimedin C  | streptozotocin            | high-fat diet |

**Table S2.** Effects of epimedin C on fasting blood glucose (FBG) at 0 and 28 d.

| Group      | FBG levels at 0<br>d (mmol·L <sup>-1</sup> ) | FBG levels at 28<br>d (mmol·L <sup>-1</sup> ) | Changes of FBG<br>levels | Significant<br>differences |
|------------|----------------------------------------------|-----------------------------------------------|--------------------------|----------------------------|
| NC group   | 6.8±0.1 <sup>d</sup>                         | 6.9±0.3 <sup>d</sup>                          | increase 1.47%           |                            |
| MC group   | 18.7±0.5 <sup>c</sup>                        | 21.5±1.1 <sup>a</sup>                         | increase 14.97%          | *                          |
| PC1 group  | 22.6±0.6 <sup>a</sup>                        | 14.5±0.7 <sup>c</sup>                         | decrease 35.84%          | *                          |
| PC2 group  | 22.8±0.3 <sup>a</sup>                        | 14.2±1.2 <sup>c</sup>                         | decrease 37.72%          | *                          |
| EC30 group | 18.7±1.6 <sup>c</sup>                        | 13.5±1.1 <sup>c</sup>                         | decrease 27.81%          | *                          |
| EC10 group | 17.1±1.1 <sup>b</sup>                        | 12.1±0.2 <sup>b</sup>                         | decrease 17.14%          | *                          |
| EC5 group  | 21.0±0.3 <sup>c</sup>                        | 17.4±1.0 <sup>b</sup>                         | decrease 6.86%           |                            |

Note: Different superscript letters indicate significant differences between groups ( $P<0.05$ ); \*, significant differences of FBG levels between 0 and 28 d ( $P<0.05$ ).

**Table S3.** Effects of epimedin C on insulin contents in serums and homeostasis model assessment of insulin resistance (HOMA-IR).

| Group      | Insulin content (mIU·L <sup>-1</sup> ) | HOMA-IR                |
|------------|----------------------------------------|------------------------|
| NC group   | 9.6±0.7 <sup>a</sup>                   | 2.9±0.5 <sup>d</sup>   |
| MC group   | 7.6±0.3 <sup>d</sup>                   | 7.0±1.0 <sup>a</sup>   |
| PC1 group  | 9.0±0.1 <sup>abc</sup>                 | 5.7±0.9 <sup>abc</sup> |
| PC2 group  | 9.2±0.4 <sup>ab</sup>                  | 6.3±1.0 <sup>ab</sup>  |
| EC30 group | 8.9±0.7 <sup>abc</sup>                 | 5.1±0.9 <sup>bc</sup>  |
| EC10 group | 8.1±0.2 <sup>cd</sup>                  | 6.0±0.8 <sup>ab</sup>  |
| EC5 group  | 7.8±0.7 <sup>d</sup>                   | 5.5±1.1 <sup>abc</sup> |

Note: Different superscript letters indicate significant differences between various groups ( $P<0.05$ ).

**Table S4.** Gene ontology (GO) assay of key differentially expressed proteins (DEPs).

| GO identity | Function                                           | Protein/Gene                                                                    | GO classification  |
|-------------|----------------------------------------------------|---------------------------------------------------------------------------------|--------------------|
| GO:0044282  | small molecule catabolic process                   | Acacb/ Dbi/ Thnsl2/ Acox2/ Got1/ Mat1a/ Oat/ Pck1/ Sult1b1/ Sult1e1             | biological process |
| GO:0006631  | fatty acid metabolic process                       | Acacb/ Cyp4a14/ Dbi/ Fads1/ Fads2/ Thnsl2/ Acox2/ Aldh3a2/ Cyp2a4/ Pck1/ Ptges3 | biological process |
| GO:1901605  | alpha-amino acid metabolic process                 | Gart/ Gm4952/ Thnsl2/ Adss/ Dglucy/ Got1/ Mat1a/ Oat                            | biological process |
| GO:0046394  | carboxylic acid biosynthetic process               | Acacb/ Cyp4a14/ Fads1/ Fads2/ Gart/ Thnsl2/ Got1/ Ptges3/ Rbp1                  | biological process |
| GO:0016053  | organic acid biosynthetic process                  | Acacb/ Cyp4a14/ Fads1/ Fads2/ Gart/ Thnsl2/ Got1/ Ptges3/ Rbp1                  | biological process |
| GO:0016054  | organic acid catabolic process                     | Acacb/ Dbi/ Thnsl2/ Acox2/ Got1/ Mat1a/ Oat/ Pck1                               | biological process |
| GO:0046395  | carboxylic acid catabolic process                  | Acacb/ Dbi/ Thnsl2/ Acox2/ Got1/ Mat1a/ Oat/ Pck1                               | biological process |
| GO:0009156  | ribonucleoside monophosphate biosynthetic process  | Gart/ Prps1/ Umps/ Adss                                                         | biological process |
| GO:0016042  | lipid catabolic process                            | Acacb/ Apob/ Ces3a/ Ces3b/ Dbi/ Pla2g12b/ Acox2/ Pck1/ Sult1e1                  | biological process |
| GO:0006520  | cellular amino acid metabolic process              | Gart/ Gm4952/ Thnsl2/ Adss/ Dglucy/ Got1/ Mat1a/ Oat                            | biological process |
| GO:0005852  | eukaryotic translation initiation factor 3 complex | Abce1/ Eif3d/ Eif3g                                                             | cellular component |
| GO:0032994  | protein-lipid complex                              | Apob/ Dbi/ Clu                                                                  | cellular component |
| GO:0005767  | secondary lysosome                                 | Fth1/ Hrg                                                                       | cellular component |
| GO:0005697  | telomerase holoenzyme complex                      | Dkc1/ Ptges3                                                                    | cellular component |
| GO:0030904  | retromer complex                                   | Snx2/ Snx5                                                                      | cellular component |
| GO:0150034  | distal axon                                        | Ap1s1/ Ctsz/ Palld/ Clu/ Got1/ Myh10                                            | cellular component |
| GO:0045178  | basal part of cell                                 | Ceacam1/ Eppk1/ Slco1a4                                                         | cellular component |
| GO:0034364  | high-density lipoprotein particle                  | Apob/ Clu                                                                       | cellular component |
| GO:0097038  | perinuclear endoplasmic reticulum                  | Dbi/ Clu                                                                        | cellular component |
| GO:0005732  | small nucleolar ribonucleoprotein complex          | Gar1/ Dkc1                                                                      | cellular component |
| GO:0031406  | carboxylic acid binding                            | Acacb/ Cyp4a14/ Thnsl2/ Acox2/                                                  | molecular function |

|            |                                                                              |                                                                          |                    |
|------------|------------------------------------------------------------------------------|--------------------------------------------------------------------------|--------------------|
| GO:0043177 | organic acid binding                                                         | Got1/ Mat1a/ Pck1<br>Acacb/ Cyp4a14/ Thnsl2/ Acox2/<br>Got1/ Mat1a/ Pck1 | molecular function |
| GO:0016903 | oxidoreductase activity,<br>acting on the aldehyde<br>or oxo group of donors | Aldh1a7/ Aox3/ Aldh3a2/ Htatip2                                          | molecular function |
| GO:0019842 | vitamin binding                                                              | Acacb/ Thnsl2/ Got1/ Oat/ Rbp1                                           | molecular function |
| GO:0016831 | carboxy-lyase activity                                                       | Umps/ Got1/ Pck1                                                         | molecular function |
| GO:1901567 | fatty acid derivative<br>binding                                             | Acbd5/ Cyp4a14/ Dbi                                                      | molecular function |
| GO:0043531 | ADP binding                                                                  | Prps1/ Mat1a/ Myh10                                                      | molecular function |
| GO:1901681 | sulfur compound<br>binding                                                   | Acacb/ Acbd5/ Apob/ Dbi/ Prelp/<br>Hrg                                   | molecular function |
| GO:0003743 | translation initiation<br>factor activity                                    | Eif3d/ Eif3g/ Eif4e                                                      | molecular function |
| GO:0016829 | lyase activity                                                               | Thnsl2/ Umps/ Dglucy/ Got1/<br>Pck1                                      | molecular function |

---

## FIGURE LEGENDS

**Figure S1.** Chemical structure of epimedin C.

Glc, glucose; Rha, rhamnose.

**Figure S2.** Volcano plots of differentially expressed proteins (DEPs).

A, DEPs in NC vs MC groups; B, DEPs in EC30 vs MC groups; C, DEPs in NC vs EC30 groups.

**Figure S3.** Hierarchical clustering analysis of DEPs.

A, DEPs in NC vs MC groups; B, DEPs in EC30 vs MC groups; C, DEPs in NC vs EC30 groups.

**Figure S4.** Gene-concept network (CNET) assay of gene ontology (GO) functions.

A, biological process (BP) and key enriched DEPs; B, cellular component (CC) and key enriched DEPs; C, molecular function (MF) and key enriched DEPs.

**Figure S5.** Typical Kyoto encyclopedia of genes and genomes (KEGG) pathways.

A, peroxisome proliferator-activated receptor (PPAR) signaling pathway; B, glycolysis/gluconeogenesis.

Red boxes represent up-regulated DEPs, and blue boxes represent down-regulated DEPs.

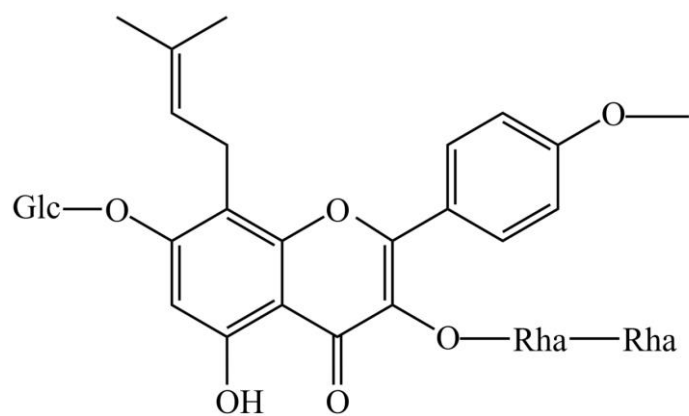

**Figure S1**

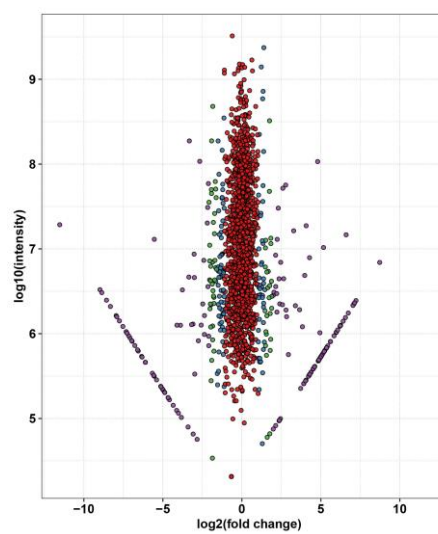

**A**

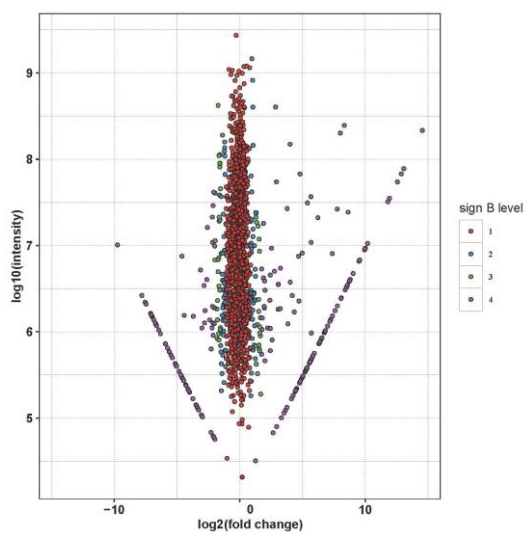

**B**

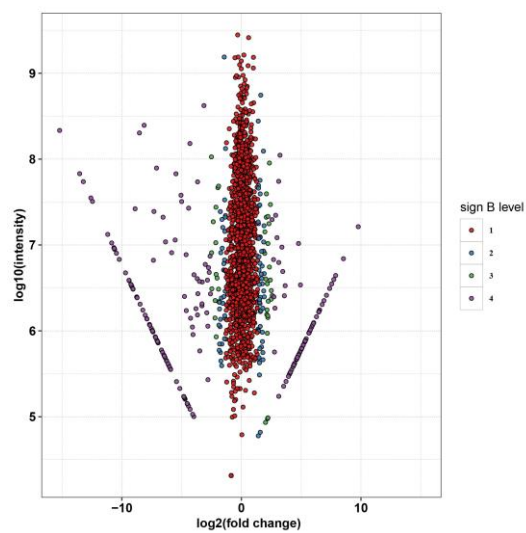

**C**

**Figure S2**



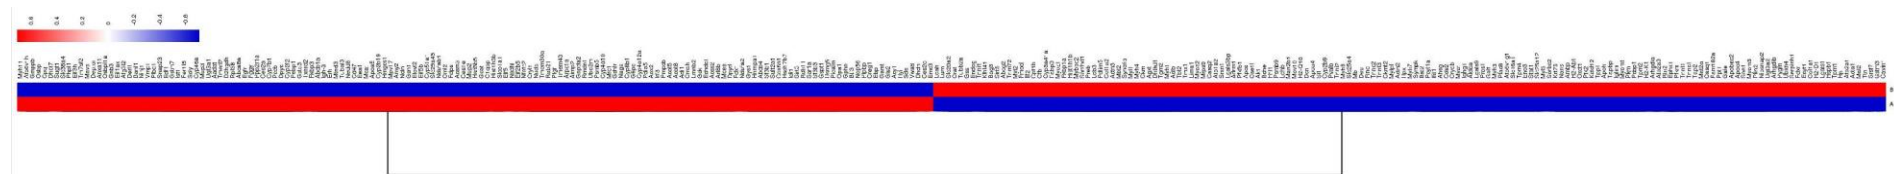

A

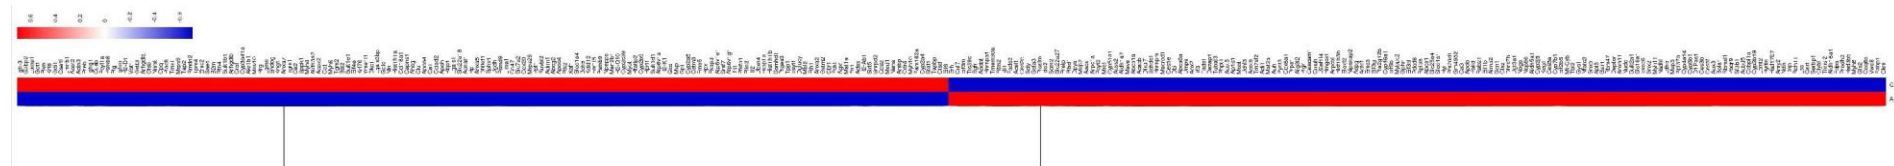

B

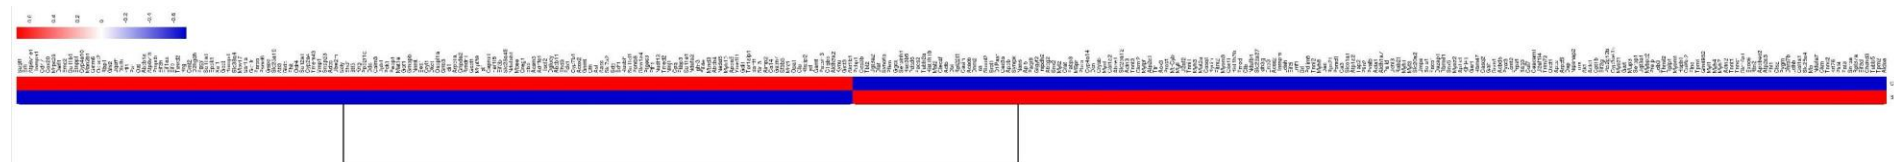

C

Figure S3

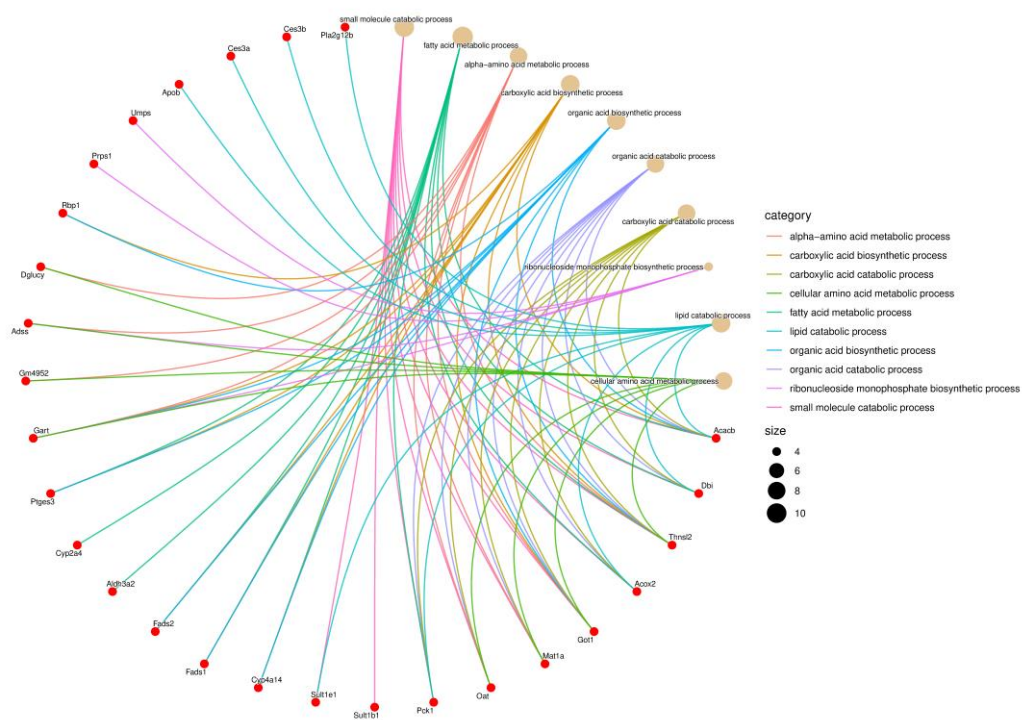

A

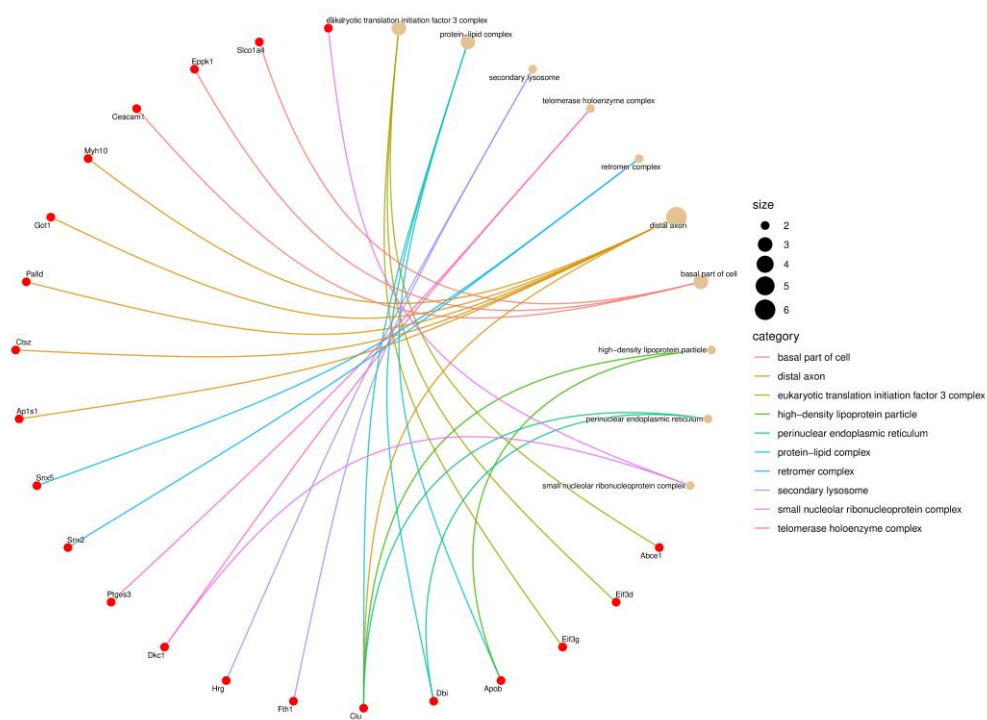**B**

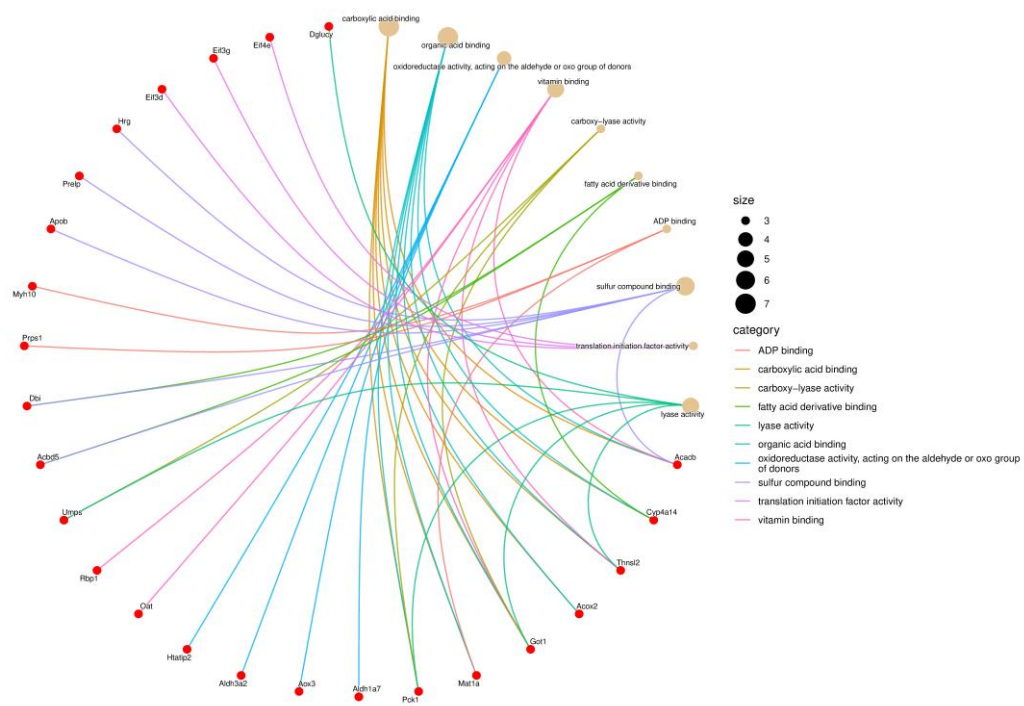

**C**  
**Figure S4**

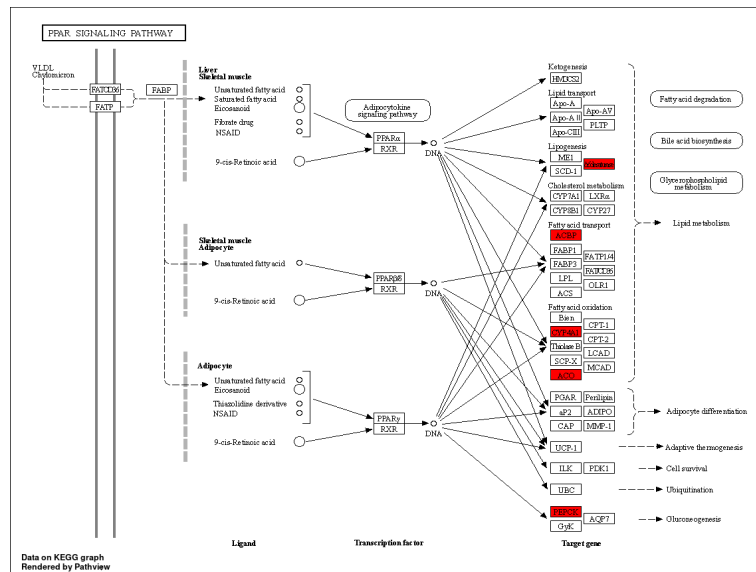

**Figure S5**
